# Supplementary material
Source: Springer Nature journal article supplement (https://www.springermedizin.de/resource/supplementary/12885_2011_2729_MOESM4_ESM.pdf/9461788)

**A**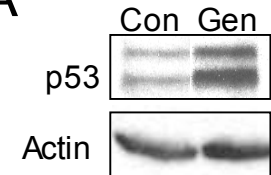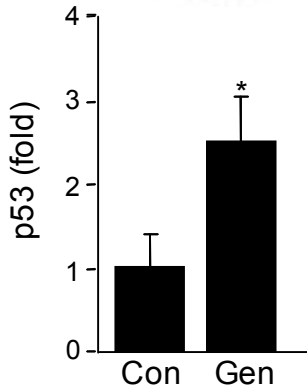**B**

IP: FOXO3  
IB: p53

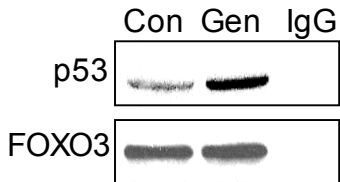**C**

HT-29 (mutated p53)

IP: FOXO3

IB: p53

Gen - - + +

EGF - + - + IgG

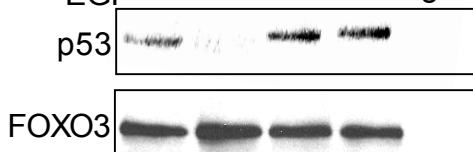**D**

HCT116 (wild type p53)

IP: FOXO3

IB: p53

Gen - - + +

EGF - + - + IgG

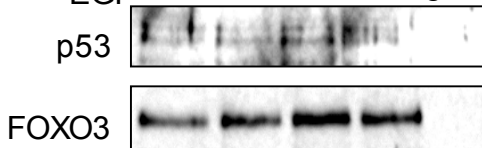

Supplement: MOESM4 [file 9461788]
